# Supplementary material
Source: HighWire-hosted journal article supplement (https://bmjopen.bmj.com/content/6/4/e011027)
Supplement: inline-supplementary-material-1 [file inline-supplementary-material-1.pdf]

## **APPENDIX 1**

### **Australian Resuscitation Outcomes Consortium (Aus-ROC) Steering Committee Members**

Professor Judith Finn, Monash University and Curtin University, Australia

Professor Peter Cameron, Monash University, Australia

Professor Stephen Bernard, The Alfred Hospital, Australia

Associate Professor Karen Smith, Ambulance Victoria, Australia

Professor Peter Thompson, Sir Charles Gairdner Hospital, Australia

Professor Andrew Tonkin, Monash University, Australia

Professor Hugh Grantham, Flinders University, Australia

Professor Peter Morley, The Royal Melbourne Hospital, Australia

Associate Professor Tony Walker, Ambulance Victoria, Australia

Professor Antonio Celenza, University of Western Australia, Australia

Professor Andrew Forbes, Monash University, Australia

Professor Graham Nicol, University of Washington, United States of America

Professor Gavin D Perkins, Warwick University, United Kingdom

Dr Janet Bray, Monash University, Australia

Dr Lahn Straney, Monash University, Australia

Dr Ben Beck, Monash University, Australia

Dr Teresa Williams, Curtin University, Australia

Dr Madoka Inoue, Curtin University, Australia

Dr Cindy Hein, SA Ambulance Service, Australia

Ms Meredith Morgan, Monash University, Australia

Mr Brian Stafford, Consumer Representative

Mr Jeff Waters, Consumer Representative
