# Supplementary material
Source: HighWire-hosted journal article supplement (https://bmjopen.bmj.com/content/6/4/e011027)
Supplement: inline-supplementary-material-2 [file inline-supplementary-material-2.pdf]

## APPENDIX 2

Demographic and socioeconomic characteristics of Australian states. Data are segregated by those regions currently participating and those not currently participating in the Aus-ROC Epistry.

|                                                   | Regions currently participating |           |           |           | Regions not currently participating |         |         |         | Australia  |
|---------------------------------------------------|---------------------------------|-----------|-----------|-----------|-------------------------------------|---------|---------|---------|------------|
| Regional Characteristic                           | VIC                             | SA        | WA        | QLD       | NSW                                 | ACT     | NT      | TAS     | Total      |
| Population (n)                                    | 5,841,667                       | 1,685,714 | 2,573,389 | 4,722,447 | 7,518,472                           | 385,996 | 245,079 | 514,762 | 23,490,736 |
| Male (%)                                          | 49.5                            | 49.6      | 50.6      | 49.9      | 49.7                                | 49.8    | 52.7    | 49.8    | 49.8       |
| Median age (years)                                | 37.3                            | 39.8      | 35.8      | 36.6      | 37.8                                | 34.6    | 31.6    | 41.2    | 37.3       |
| Aboriginal and Torres Strait Islander Peoples (%) | 0.7                             | 1.9       | 3.1       | 3.6       | 2.5                                 | 1.5     | 26.8    | 4.0     | 2.6        |
| Total born overseas (%)                           | 31.4                            | 26.7      | 37        | 26.3      | 31.4                                | 28.6    | 25.4    | 16.4    | 30.2       |
| Average wage and salary income (\$)               | 50,276                          | 46,551    | 57,365    | 49,863    | 53,917                              | 60,987  | 54,082  | 43,521  | 51,923     |
| Unemployment rate (%)                             | 5.4                             | 5.7       | 4.7       | 6.1       | 5.9                                 | 3.6     | 5.3     | 6.4     | 5.6        |
| Population of capital city (% of state)           | 75.8                            | 77.3      | 78.3      | 48.1      | 64.2                                | *       | 56.6    | 42.5    |            |
|                                                   |                                 |           |           |           |                                     |         |         |         |            |
| <i>ABS Remoteness Area **</i>                     |                                 |           |           |           |                                     |         |         |         |            |
| Major Cities of Australia (%)                     | 76.5                            | 73.4      | 76.7      | 62.0      | 74.2                                | 99.8    | 56.6    | 65.6    | 70.5       |
| Inner Regional Australia (%)                      | 19.1                            | 10.8      | 9.0       | 20.3      | 19.3                                | 0.2     | 20.6    | 32.3    | 18.2       |
| Outer Regional Australia (%)                      | 4.3                             | 12.1      | 7.5       | 14.7      | 6.0                                 | 0.0     | 22.8    | 1.6     | 8.9        |
| Remote Australia (%)                              | 0.1                             | 2.7       | 4.1       | 1.7       | 0.4                                 | 0.0     | 0.0     | 0.5     | 1.4        |
| Very Remote Australia (%)                         | 0.0                             | 0.9       | 2.7       | 1.3       | 0.1                                 | 0.0     | 0.0     | 0.0     | 0.9        |

\* Note that there is no segregation of Canberra (the capital city of the Australian Capital Territory (ACT)) and the state of ACT according to the Australian

Bureau of Statistics (ABS). \*\* The Remoteness Areas are a geographical standard of relative remoteness provided by the ABS. All data sourced from the

Australian Bureau of Statistics.<sup>17,18</sup> VIC – Victoria, SA – South Australia, WA – Western Australia, QLD – Queensland, NSW – New South Wales, ACT –

Australian Capital Territory, NT – Northern Territory, TAS – Tasmania.
